# Supplementary material for: Tet-Trap, a genetic approach to the identification of bacterial RNA thermometers: application to Pseudomonas aeruginosa
Source: PubMed Central journal article supplement — RNA. 2014 Dec;20(12):1963–76. doi: 10.1261/rna.044354.114 (PMC4238360; doi:10.1261/rna.044354.114), 2014-12
Supplement: supp_044354.114_SuppTableS1.pdf [file supp_044354.114_SuppTableS1.pdf]

### Supplementary table S1. Bacterial strains, plasmids, phages and oligonucleotides

| Strain                        | Relevant Genotype                                                                                 | Origin or reference              |
|-------------------------------|---------------------------------------------------------------------------------------------------|----------------------------------|
| <i>Pseudomonas aeruginosa</i> |                                                                                                   |                                  |
| PAO1                          |                                                                                                   | (Stover <i>et al.</i> , 2000)    |
| PA14                          |                                                                                                   | (Rahme <i>et al.</i> , 1995)     |
| <i>Escherichia coli</i>       |                                                                                                   |                                  |
| C-1a                          | <i>E. coli</i> C, prototrophic                                                                    | (Sasaki and Bertani, 1965)       |
| C-5708                        | C-1a <i>rpsL31</i>                                                                                | laboratory collection            |
| C-5868                        | C-1a $\Delta pnp-751 \Delta bcsA::cat Tn10$                                                       | (Carzaniga <i>et al.</i> , 2009) |
| C-5898                        | C-1a <i>tetRp alacZ tetAp-kanR</i>                                                                | this work                        |
| C-5899                        | C-1a <i>tetRp-alacZ tetAp-aadgfp</i>                                                              | this work                        |
| C-5901                        | C-1a $\Delta bio$ <i>tetRp- alacZ tetAp-aadgfp Pcat<sup>+</sup>-tetR:kan<sup>R</sup></i>          | this work                        |
| C-5907                        | C-1a $\Delta bio$ <i>tetRp- alacZ tetAp-aadgfp Pcat<sup>+</sup>-tetR</i>                          | this work                        |
| C-5912                        | C-1a <i>tetRp- alacZ tetAp-rpsL<sup>+</sup>:cat</i>                                               | this work                        |
| C-5916                        | C-5708 <i>tetRp-alacZ tetAp-rpsL<sup>+</sup>:cat</i>                                              | this work                        |
| C-5918                        | C-5708 <i>tetRp- alacZ tetAp-rpsL<sup>+</sup></i>                                                 | this work                        |
| C-5920                        | C-5708 <i>tetRp- alacZ tetAp-rpsL<sup>+</sup> Pcat-10<sup>CATTTA</sup> - tetR:kan<sup>R</sup></i> | this work                        |
| BW25113                       | <i>E. coli</i> K-12                                                                               | (Datsenko and Wanner, 2000)      |
| DH10B                         |                                                                                                   | (Grant <i>et al.</i> , 1990)     |
| KG264                         | BW25113 <i>Pcat<sup>+</sup>-tetR:kan<sup>R</sup></i>                                              | this work                        |

KG265      BW25113 *Pcat-10<sup>CATTTA</sup> -tetR:kan<sup>R</sup>*      this work

| <b>Plasmids and phage</b> | <b>Relevant characteristics<sup>a</sup></b>                                                                       | <b>Reference</b>                 |
|---------------------------|-------------------------------------------------------------------------------------------------------------------|----------------------------------|
| pBAD2-bgaB                | carries <i>Bacillus stearothermophilus</i> <i>bgaB</i> gene                                                       | (Klinkert <i>et al.</i> , 2012)  |
| pBAD24-Δ1                 | pBAD24 derivative                                                                                                 | (Carzaniga <i>et al.</i> , 2012) |
| pGM362                    | carries pHP45 t <sub>Ω</sub> terminator                                                                           | (Briani <i>et al.</i> , 2000)    |
| pGM742                    | CamR; oriVCold                                                                                                    | (Regonesi <i>et al.</i> , 2004)  |
| pGM930                    | pBAD24-Δ1 derivative carrying pHP45 t <sub>Ω</sub> terminator downstream of <i>araBp</i>                          | this work                        |
| pGM931                    | pHERD20T derivative carrying <i>araBp</i> - t <sub>Ω</sub> region of pGM930                                       | this work                        |
| pGM932                    | pGM742 derivative carrying the <i>lacZα-tetRp-tetO-tetAp-kan<sup>R</sup></i> cassette                             | this work                        |
| pGM956                    | pGZ119HE derivative. Carries pQE31-S1 Shine-Dalgarno and ATG in frame with ST-TIP2.                               | this work                        |
| pGM957                    | pGZ119HE derivative. Carries pQE31-S1 Shine-Dalgarno and ATG out of frame with ST-TIP2.                           | this work                        |
| pGM978                    | pGM931 derivative, contains <i>bgaB</i> under pBAD control                                                        | this work                        |
| pGM980                    | pGM978 derivative, carries <i>ptxS</i> (2487532-2488013) translationally fused to <i>bgaB</i> .                   | this work                        |
| pGM981                    | pGM978 derivative, carries <i>ptxS</i> (2487779-2488013) translationally fused to <i>bgaB</i>                     | this work                        |
| pGM989                    | pGM978 derivative, carries <i>recA</i> (2334354-2334277) translationally fused to <i>bgaB</i>                     | this work                        |
| pGM2011                   | pGM931 derivative with the insertion of sfGFP                                                                     | this work                        |
| pGM2012                   | pGM2011 derivative, carries PA5194 (5846939-5847277) translationally fused to sfGFP                               | this work                        |
| pGM2013                   | pGM2011 derivative, carries PA5194 (5847080-5847277) translationally fused to sfGFP                               | this work                        |
| pGM2013CCC                | pGM2013 derivative, carries the substitution of the TTT <sub>5847127-5847129</sub> sequence with three cytidines  | this work                        |
| pGM2013AAA                | pGM2013 derivative, carries the substitution of the TTT <sub>5847127-5847129</sub> sequence with three adenosines | this work                        |

|            |                                                                                              |                                       |
|------------|----------------------------------------------------------------------------------------------|---------------------------------------|
| pGM2016    | pGM2011 derivative, carries <i>recA</i> (2334354-2334277) translationally fused to sfGFP     | this work                             |
| pGZ119HE   | <i>oriVCold</i> ; CamR ; <i>P<sub>tac</sub></i>                                              | (Lessl <i>et al.</i> , 1992)          |
| pHERD20T   | <i>P. aeruginosa-E. coli</i> shuttle vector                                                  | (Qiu <i>et al.</i> , 2008)            |
| pKD46      | carries $\lambda$ RED recombination genes                                                    | (Datsenko and Wanner, 2000)           |
| pPA5194-HA | pGM931 derivative, carries PA5194 (5847080-5847931) translationally fused to HA              | this work                             |
| pPtxS-HA   | pGM931 derivative, carries <i>ptxS</i> (2487779-2488875) translationally fused to HA         | this work                             |
| pQE31S1    | AmpR; ColE1; <i>rpsA</i> under <i>P<sub>tac</sub></i> promoter                               | (Sukhodolets and Garges, 2003)        |
| pUC19      | AmpR; ColE1                                                                                  | (Yanisch-Perron <i>et al.</i> , 1985) |
| pWH2354    | CamR; p15A; <i>lacI<sup>l</sup></i> ; <i>trxA-TIP2</i> under <i>P<sub>tac</sub></i> promoter | (Georgi <i>et al.</i> , 2012)         |
| pXG-10SF   | pSC101* replicon; CamR                                                                       | (Corcoran <i>et al.</i> , 2012)       |
| pZR80-2    | carries the chimeric <i>aadA::gfp</i> gene                                                   | (Rizzi <i>et al.</i> , 2008)          |
| P1 HTF     | High transduction frequency phage P1 derivative                                              | (Wall and Harriman, 1974)             |

---

| Oligo | Sequence <sup>b</sup>                                             |
|-------|-------------------------------------------------------------------|
| 1396  | AAGGAGGTGATCCAGCCGCA                                              |
| 2600  | CTATCAGTGATAGAGAAAAGTGAAATGATTGAACAAGATGGATTG                     |
| 2601  | TAGTCTCGGTCCCCATAAAAAAGGGACCTCTAGGGTCCCCAAGTCGGTCA<br>TTTCGAACCCC |
| 2602  | CATTAATTCCTAATTTTTGTTGACAC                                        |
| 2603  | TTCACTTTTCTCTATCACTGATAG                                          |
| 2604  | GAAATTCAGTAAAAGCCTCCGACCGGAGGCTTTTGACTGGCGGGTGTCGGG<br>GCTG       |
| 2605  | GTGTCAACAAAAATTAGGAATTAATGA TGACCATGATTACGCCAAGC                  |

2606 ATGTCGCGGTTGATCCTGAAGGAAAAC CTC

2617 AGCTTATTAAGAGGAGAAATTAATA TGAGAGGCATG

2618 CCTCTCATAGTTAATTTCTCCTCTTTAATA

2636 GGTTGAAATGACCGACTTGGGGACCCTAGAGGTCCCTTTTTTATGGGGGG  
TGTAGGCTGGAGCTGCTT

2638 TTGATCCTGAAGGAAAACCTCGCGCCTTACCTGTTGAGTAATAGTCTCGGT  
TAAAAAATGCCCTCTTGGGTTA

2683 TGATAGAGTTATTTTACCACTCCCTATCAGTGATAGAGAAAAGTGAAATGG  
ATCCCGAA GCGGTG

2684 GACCTCTAGGGTCCCCAAGTCGGTCATTTTGAACCCCAGAGTCCCGCTCAT  
GATGCCTGGAATTAATTCC

2685 AGCCTGCTTTTTTATACTAACTTGAGCGAAACGGGAAGGTAAAAGACAAC  
TTCGTCTGTTTCTACTGG

2686 CCATGGGGCTTCTCCAAAACGTGTTTTTTGTTGTTAATTCGGTGTAGACTTT  
GTGTAGGCTGGAGCTGC

2689 ACCCGGGAGTGGTGGTGGCGGCAGCGGCGGTGGTGGATCCGGTGGCGGTG  
GCTC

2690 TACCGGTACCGCCGCCACCCGAACCGCCACCGCCAGAGCCACCGCCACCGG  
A

2691 GGCGGCGGTACCGGTAGCGATAAAAATTATTCACCTGACT

2692 **CCCGAATT**CCGTTACCAATGCCACATCCAC AT

2693 CCCTGCAGCATGCAAACCCGGGAGTGGTG GT

2712 TAAAAAATGCCCTCTTGGGTACATATGAA TATCCTCCTTAGT

2713 TCAGTGATAGAGAAAAGTGAAATGGCAAC AGTTAACCAGC

2714 AAGTCGGTCATTTTGAACCTTACTTAACGGA GAACC

2739 GAATTAAGCTTGCATGCAACC

2740 GCCGCCACCACCACTCC

2803 CTCGGTACCAGTAAAGGAGAAGAACTTTTCAC

2804 CTCCTGCAGCTATTTGTATAGTTCATCCATGC

2811 GGTTTCAACTCCTGGCATCC

2846 GCGCCATGG GGGAGCATATGCGAATCTTC

2847 CCCTGATCTCGACCTGCA

2850 GGGCCATGGCTCGCCGATTGATCGCTTTC

2851 CCCGAATTCATGGTCGATGGCGCGCTC

2852 GGGCCATGGGGTTTCAACTCCTGGCATCC

2865 TCAACTTAGCATCTTCATAACC

2871 GAATTGGGACAACCTCCAGTG

2909 *CTAATACGACTCACTATAGGGTTTCAACTCCTGGCATCC*

2910 GGCCTCGGCCACCTGGTT

2915 TCTCCATGGCAACAGAACATATTGACTATCC

2916 CACGAATTCCTTTCTGTTTGTTCGTCGATAG

2928 TCTGGTACCCAACAGAACATATTGACTATCC

2929 CACGGTACCTTTCTGTTTGTTCGTCGATAG

2976 *CTAATACGACTCACTATAGGGCCTCGGCCACCTGGTT*

3003 GGAACGGAGAGGCATTATCC

3004 GGGGGTACCCTTGTCGAAGAGCCAGAAC

3005 GGGGGTACCCTGCGCTCGAGATCGAC

3006 GGGGGTACCGCTTCGTGACAGTCGTAC

3040 *CTAATACGACTCACTATAGGGCTTCGTGACAGTCGTAC*

3041 GCAGGAGCGCCAGAAGAT

3141 ATGGATAATGCCTCTCCGTT  
3142 AACGGAGAGGCATTATCCATAGGGTCGTTTCCCC  
3143 AACGGAGAGGCATTATCCATATTTTCGTTTCCCC  
3144 TCAAGCGTAGTCTGGGACGTCGTATGGGTAGGCCGAGTCGCGGACCA  
3145 TCAAGCGTAGTCTGGGACGTCGTATGGGTAGGCCGAGTCGCGGACCA  
3150 *CTAATACGACTCACTATAGGGCCCCAGAGCCACAGG*

---

<sup>a</sup> *P.aeruginosa* coordinates refer to Genbank accession numbers NC\_002516; *E. coli recA* gene coordinates refer to Genbank Accession Number U00096.2.

<sup>b</sup> Boldface characters, restriction sites; italics, T7 promoter

## REFERENCES

- Briani, F., Ghisotti, D., and Dehò, G. (2000). Antisense RNA-dependent transcription termination sites that modulate lysogenic development of satellite phage P4. *Mol.Microbiol.* **36**, 1124-1134.
- Carzaniga, T., Antoniani, D., Dehò, G., Briani, F., and Landini, P. (2012). The RNA processing enzyme polynucleotide phosphorylase negatively controls biofilm formation by repressing poly-N-acetylglucosamine (PNAG) production in *Escherichia coli* C. *BMC.Microbiol.* **12**, 270.
- Carzaniga, T., Briani, F., Zangrossi, S., Merlino, G., Marchi, P., and Dehò, G. (2009). Autogenous regulation of *Escherichia coli* polynucleotide phosphorylase expression revisited. *J.Bacteriol.* **191**, 1738-1748.
- Corcoran, C.P., Podkaminski, D., Papenfort, K., Urban, J.H., Hinton, J.C., and Vogel, J. (2012). Superfolder GFP reporters validate diverse new mRNA targets of the classic porin regulator, MicF RNA. *Mol Microbiol* **84**, 428-445.
- Datsenko, K.A., and Wanner, B.L. (2000). One-step inactivation of chromosomal genes in *Escherichia coli* K-12 using PCR products. *Proc.Natl.Acad.Sci.U.S.A* **97**, 6640-6645.
- Georgi, C., Buerger, J., Hillen, W., and Berens, C. (2012). Promoter strength driving TetR determines the regulatory properties of Tet-controlled expression systems. *PloS one* **7**, e41620.
- Grant, S.G., Jessee, J., Bloom, F.R., and Hanahan, D. (1990). Differential plasmid rescue from transgenic mouse DNAs into *Escherichia coli* methylation-restriction mutants. *Proc Natl Acad Sci U S A* **87**, 4645-4649.
- Klinkert, B., Cimdins, A., Gaubig, L.C., Rossmann, J., Aschke-Sonnenborn, U., and Narberhaus, F. (2012). Thermogenetic tools to monitor temperature-dependent gene expression in bacteria. *Journal of biotechnology* **160**, 55-63.
- Lessl, M., Balzer, D., Lurz, R., Waters, V.L., Guiney, D.G., and Lanka, E. (1992). Dissection of IncP conjugative plasmid transfer: definition of the transfer region Tra2 by mobilization of the Tra1 region in trans. *J.Bacteriol.* **174**, 2493-2500.

- Qiu, D., Damron, F.H., Mima, T., Schweizer, H.P., and Yu, H.D. (2008). PBAD-based shuttle vectors for functional analysis of toxic and highly regulated genes in *Pseudomonas* and *Burkholderia* spp. and other bacteria. *Appl. Environ. Microbiol.* **74**, 7422-7426.
- Rahme, L.G., Stevens, E.J., Wolfort, S.F., Shao, J., Tompkins, R.G., and Ausubel, F.M. (1995). Common virulence factors for bacterial pathogenicity in plants and animals. *Science* **268**, 1899-1902.
- Regonesi, M.E., Briani, F., Ghetta, A., Zangrossi, S., Ghisotti, D., Tortora, P., and Deho', G. (2004). A mutation in polynucleotide phosphorylase from *Escherichia coli* impairing RNA binding and degradosome stability. *Nucleic Acids Res.* **32**, 1006-1017.
- Rizzi, A., Pontiroli, A., Brusetti, L., Borin, S., Sorlini, C., Abruzzese, A., Sacchi, G.A., Vogel, T.M., Simonet, P., Bazzicalupo, M., *et al.* (2008). Strategy for *in situ* detection of natural transformation-based horizontal gene transfer events. *Applied and environmental microbiology* **74**, 1250-1254.
- Sasaki, I., and Bertani, G. (1965). Growth abnormalities in Hfr derivatives of *Escherichia coli* strain C. *J. Gen. Microbiol.* **40**, 365-376.
- Stover, C.K., Pham, X.Q., Erwin, A.L., Mizoguchi, S.D., Warrenner, P., Hickey, M.J., Brinkman, F.S., Hufnagle, W.O., Kowalik, D.J., Lagrou, M., *et al.* (2000). Complete genome sequence of *Pseudomonas aeruginosa* PAO1, an opportunistic pathogen. *Nature* **406**, 959-964.
- Sukhodolets, M.V., and Garges, S. (2003). Interaction of *Escherichia coli* RNA polymerase with the ribosomal protein S1 and the Sm-like ATPase Hfq. *Biochemistry* **42**, 8022-8034.
- Wall, J.D., and Harriman, P.D. (1974). Phage P1 mutants with altered transducing abilities for *Escherichia coli* *Virology* **59**, 532-544.
- Yanisch-Perron, C., Vieira, J., and Messing, J. (1985). Improved M13 phage cloning vectors and host strains: nucleotide sequences of the M13mp18 and pUC19 vectors. *Gene* **33**, 103-119.
